# Supplementary material for: H2O2 production on a carbon cathode loaded with a nickel carbonate catalyst and on an oxide photoanode without an external bias
Source: Royal Society of Chemistry journal article supplement (doi:10.1039/d1ra01045j), 2021-01-01
Supplement: d1ra01045j1.pdf [file d1ra01045j1.pdf]

Table S1 The FE(H<sub>2</sub>O<sub>2</sub>),  $J_{\text{Total}}$ , and  $J_{\text{ap}}(\text{H}_2\text{O}_2)$  of 10 wt% various Ni salts loaded on the KB cathodes.

| Ni-salts <sup>(1)</sup>           | FE(H <sub>2</sub> O <sub>2</sub> ) / % <sup>(2)</sup> | $J_{\text{Total}}$ / mA cm <sup>-2</sup> <sup>(3)</sup> | $J_{\text{ap}}(\text{H}_2\text{O}_2)$ / mA cm <sup>-2</sup> |
|-----------------------------------|-------------------------------------------------------|---------------------------------------------------------|-------------------------------------------------------------|
| Ni(NO <sub>3</sub> ) <sub>2</sub> | 85                                                    | -8.1                                                    | -6.9                                                        |
| Ni(SO <sub>4</sub> )              | 82                                                    | -7.2                                                    | -5.9                                                        |
| NiCl <sub>2</sub>                 | 81                                                    | -7.6                                                    | -6.2                                                        |
| Ni(COOH) <sub>2</sub>             | 82                                                    | -6.4                                                    | -5.2                                                        |
| NiO                               | 72                                                    | -6.1                                                    | -4.4                                                        |
| Ni(OH) <sub>2</sub>               | 79                                                    | -8.0                                                    | -6.3                                                        |
| NiCO <sub>3</sub>                 | 85                                                    | -8.1                                                    | -6.9                                                        |
| nothing                           | 59                                                    | -4.0                                                    | -2.4                                                        |

(1) The loading amount of 10 wt% Ni salt on the KB cathode was prepared by impregnation and dried at 353 K.

(2) The FE(H<sub>2</sub>O<sub>2</sub>) was measured at passed charge after 5 C.

(3) The  $J_{\text{Total}}$  was measured at a constant potential of +0.5 V (vs. RHE).

Table S2 Comparison of H<sub>2</sub>O<sub>2</sub> production rate,  $J(\text{Total})$ , and FE(H<sub>2</sub>O<sub>2</sub>) using noble-metal-free electrocatalyst cathode under near-neutral pH condition in electrolytes.

|                                      | pH  | Potential / V<br>(vs. RHE) | $J(\text{Total}) /$<br>$\text{mA cm}^{-2}$ | FE(H <sub>2</sub> O <sub>2</sub> ) / % | H <sub>2</sub> O <sub>2</sub> production rate   |                                                   | Refs.      |
|--------------------------------------|-----|----------------------------|--------------------------------------------|----------------------------------------|-------------------------------------------------|---------------------------------------------------|------------|
|                                      |     |                            |                                            |                                        | $\text{mg L}^{-1} \text{h}^{-1} \text{cm}^{-2}$ | $\text{mmol h}^{-1} \text{g}^{-1} \text{cm}^{-2}$ |            |
| Ni <sub>10</sub> /KBHNO <sub>3</sub> | 8.8 | 0.5                        | -12.0                                      | 82                                     | 177.6                                           | 121.9                                             | this study |
| Ni <sub>10</sub> /KBHNO <sub>3</sub> | 8.8 | 0.2                        | -39.0                                      | 68                                     | 481.4                                           | 330.3                                             | this study |
| HPC-H24                              | 7   | 0.36                       | -1.8                                       | 60                                     | 112.4                                           | 14.7                                              | (A)        |
| modified graphite felt               | 7   | 0                          | -2.7                                       | 81                                     | 87.9                                            | -                                                 | (B)        |
| polypyrrole/MWCNT                    | 9   | 0.5                        | -                                          | -                                      | 1.1                                             | -                                                 | (C)        |
| WSoyGnP                              | 8.8 | 0.5                        | -1.1                                       | 39                                     | 20.4                                            | 31.5                                              | (D)        |
| carbon fiber                         | 7   | 0.5                        | -2.1                                       | 52                                     | 0.7                                             | 6.8                                               | (E)        |
| Co/Carbon                            | 7   | 0.2                        | -1.0                                       | -                                      | 0.1                                             | 0.04                                              | (F)        |
| F doped porous carbon                | 7   | -0.1                       | -                                          | 71                                     | 120.6                                           | 23.7                                              | (G)        |

Table S3 Comparison of reported values on H<sub>2</sub>O<sub>2</sub> production rates and STC(H<sub>2</sub>O<sub>2</sub>) using photoelectrochemical systems without applied bias.

| Photoanode                                                         | Cathode                              | Applied bias     | H <sub>2</sub> O <sub>2</sub> production rate / $\mu\text{mol}\cdot\text{min}^{-1}\cdot\text{cm}^{-2}$ | STC (H <sub>2</sub> O <sub>2</sub> ) / % <sup>(a)</sup> | Reactor <sup>(b)</sup> | H <sub>2</sub> O <sub>2</sub> production type | Refs.     |
|--------------------------------------------------------------------|--------------------------------------|------------------|--------------------------------------------------------------------------------------------------------|---------------------------------------------------------|------------------------|-----------------------------------------------|-----------|
| BiVO <sub>4</sub> /WO <sub>3</sub>                                 | Ni <sub>10</sub> /KBHNO <sub>3</sub> | No external bias | 0.92                                                                                                   | 1.75                                                    | One-compartment        | Both sides                                    | This work |
| BiVO <sub>4</sub>                                                  | Mesoporous carbon                    | No external bias | 0.48                                                                                                   | 0.92                                                    | Two-compartment        | Both sides                                    | (M)       |
| Al <sub>2</sub> O <sub>3</sub> /BiVO <sub>4</sub> /WO <sub>3</sub> | WSoyGnP                              | No external bias | 0.02                                                                                                   | 0.04                                                    | Two-compartment        | Both sides                                    | (I)       |
| BiVO <sub>4</sub> /WO                                              | Au                                   | No external bias | 0.08                                                                                                   | 0.15                                                    | One-compartment        | Both sides                                    | (N)       |
| Mo-BiVO <sub>4</sub>                                               | AQ-CNT/C                             | No external bias | 0.27                                                                                                   | 0.51                                                    | Two-compartment        | Both sides                                    | (O)       |
| WO <sub>3</sub>                                                    | Coll(Ch)                             | No external bias | 0.11                                                                                                   | 0.66                                                    | Two-compartment        | Cathode side                                  | (P)       |
| FeO(OH)/BiVO <sub>4</sub>                                          | Coll(Ch)                             | No external bias | 0.17                                                                                                   | 1.06                                                    | Two-compartment        | Cathode side                                  | (Q)       |

(1) The STC(H<sub>2</sub>O<sub>2</sub>) value was calculated using Eq. 8.

(2) Two-compartment reactor was used with an ion-exchange membrane.

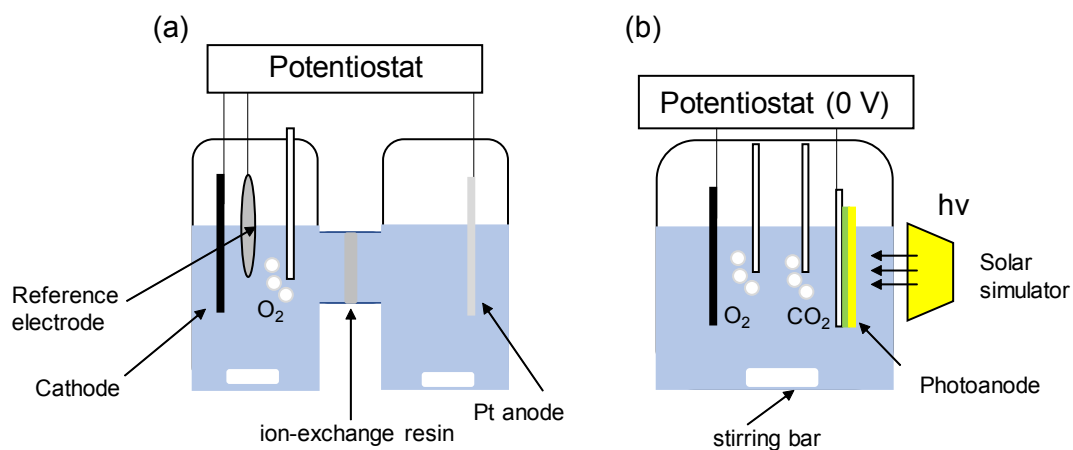

Fig. S1 Schematic illustration of electrochemical systems. (a) cathodic production of  $\text{H}_2\text{O}_2$  through  $\text{O}_2$  reduction in a two-compartment cell. (b) two-electrode system of photoanodic and cathodic production of  $\text{H}_2\text{O}_2$  in a one compartment without an external bias (0 V) under solar simulated light.  $\text{CO}_2$  and  $\text{O}_2$  gases were bubbled each for  $50 \text{ mL min}^{-1}$  into the cell equipped with an ice bath (273–278 K) with stirring at 100 rpm.

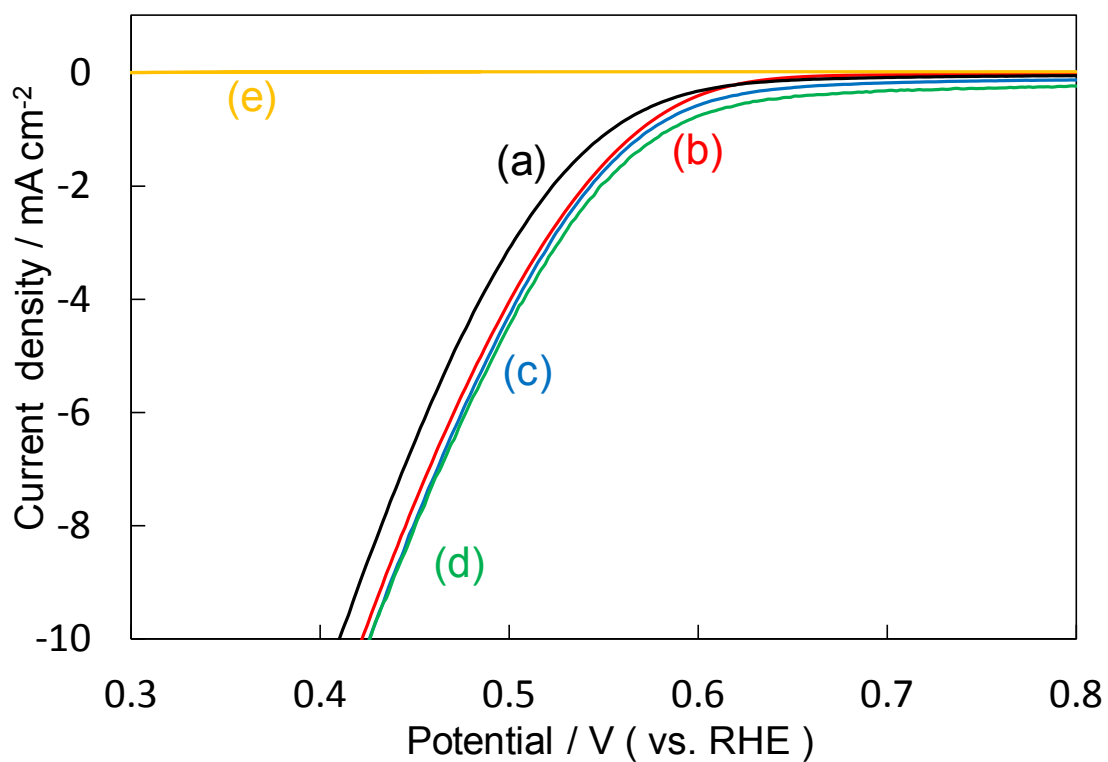

Fig. S2  $I$ - $E$  curves of the loading amount on the KB cathode: (a)  $0.7 \text{ mg cm}^{-2}$ , (b)  $1.5 \text{ mg cm}^{-2}$ , (c)  $1.8 \text{ mg cm}^{-2}$ , (d)  $3.2 \text{ mg cm}^{-2}$  at a scan rate of  $2 \text{ mV s}^{-1}$ . Exfoliation of KB powder from the CP substrate was observed in (d).

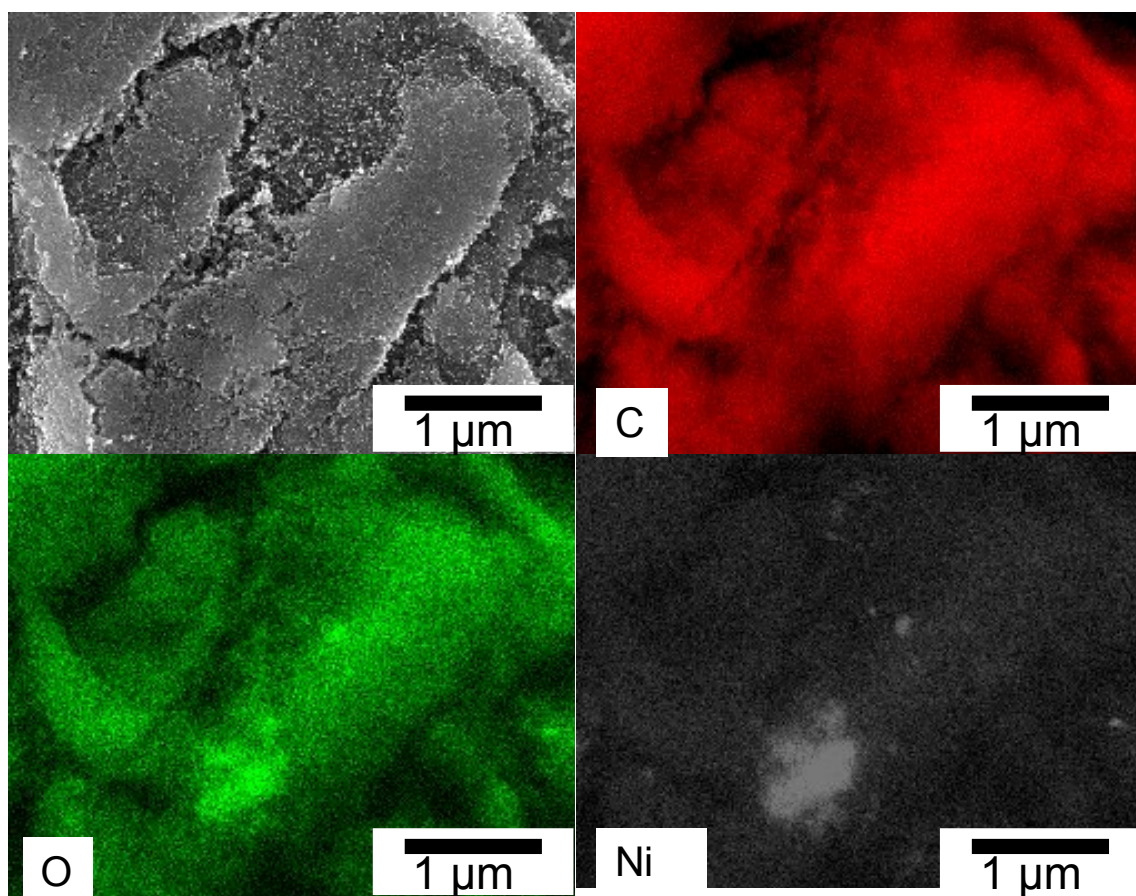

Fig. S3 SEM and EDX images of Ni<sub>100</sub>/KB. Scanning electron microscope and energy-dispersive X-ray spectroscopy (SEM and EDS, Hitachi, SU9000) measurements were carried out with a field emission gun operating at 15 kV. In Ni-EDX measurement, a large aggregation (>0.5 μm) of the Ni element was observed.

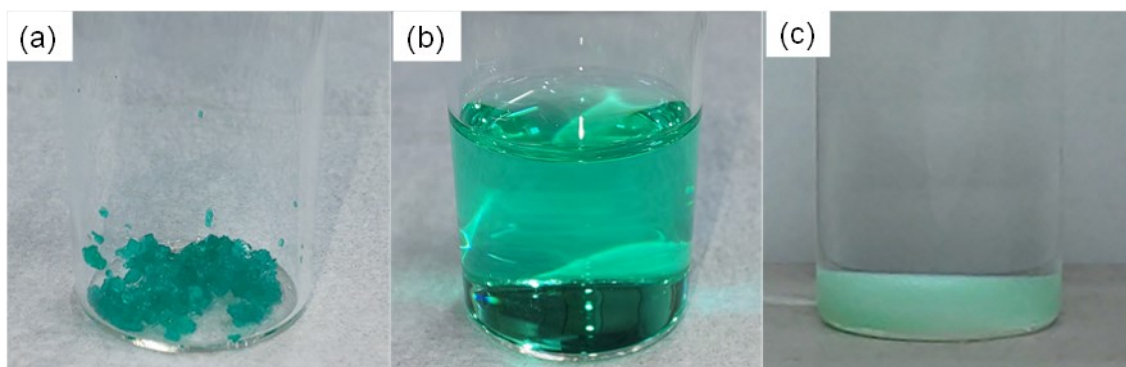

Fig. S4 (a)  $\text{Ni}(\text{NO}_3)_2 \cdot 6\text{H}_2\text{O}$  (purchased from Fujifilm Wako Pure Chemicals Corporation), (b) aqueous solution of  $\text{Ni}(\text{NO}_3)_2$ , and (c) precipitation with 2.0 M  $\text{KHCO}_3$  added to (b).

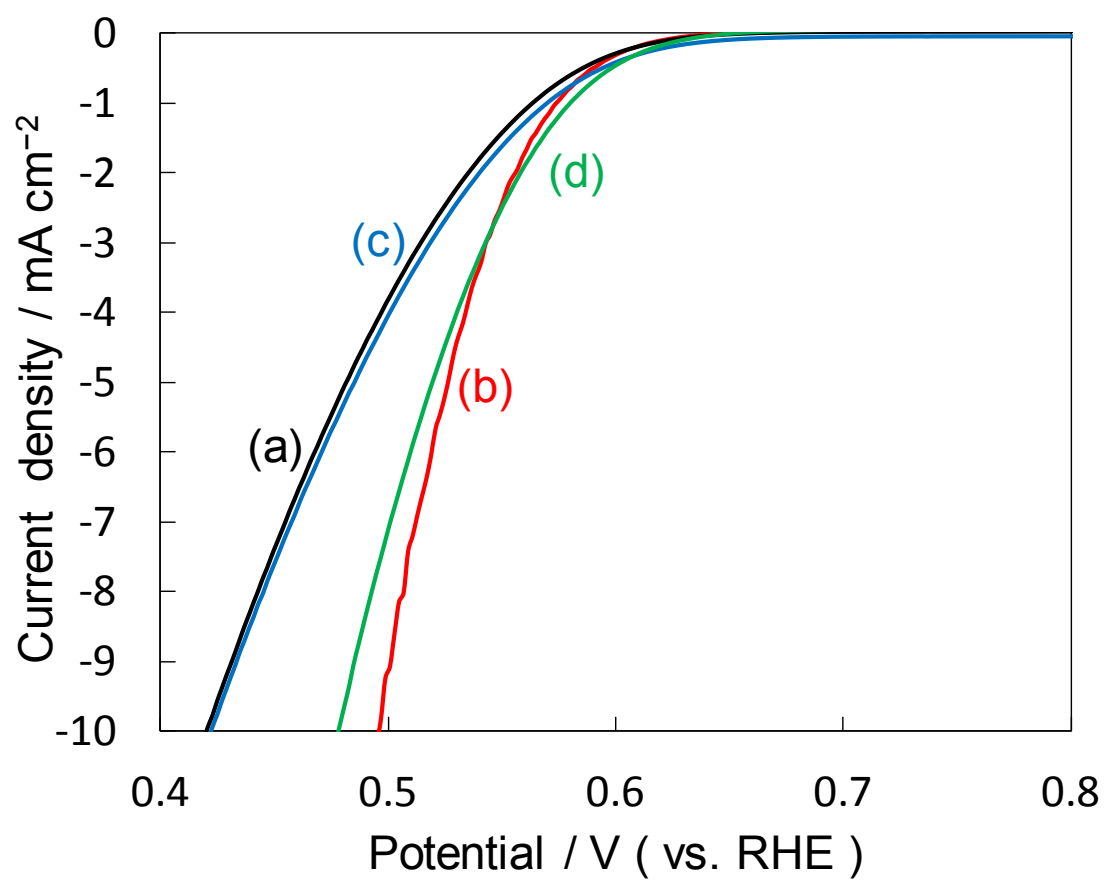

Fig. S5  $I$ - $E$  curves of (a) pristine KB powder, (b) Ni<sub>10</sub>/KB cathode, (c) Ni<sub>10</sub>/KB cathode washed with distilled water, and (d) Ni<sub>10</sub>/KB cathode washed with 2.0 M KHCO<sub>3</sub> at a scan rate of 2 mV s<sup>-1</sup>.



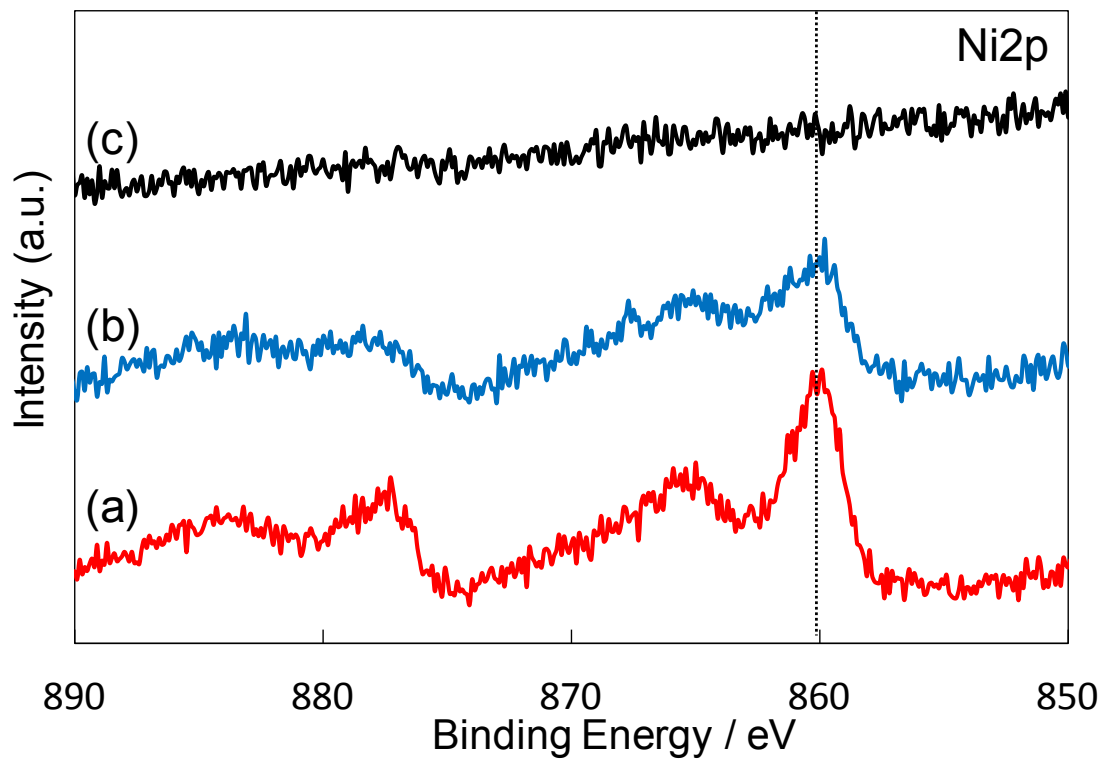

Fig. S6 Ni<sub>2p</sub> XPS spectra of (a) Ni<sub>10</sub>/KB cathode, (b) after washing with 2.0 M KHCO<sub>3</sub> aqueous solution, and (c) after washing with distilled water.

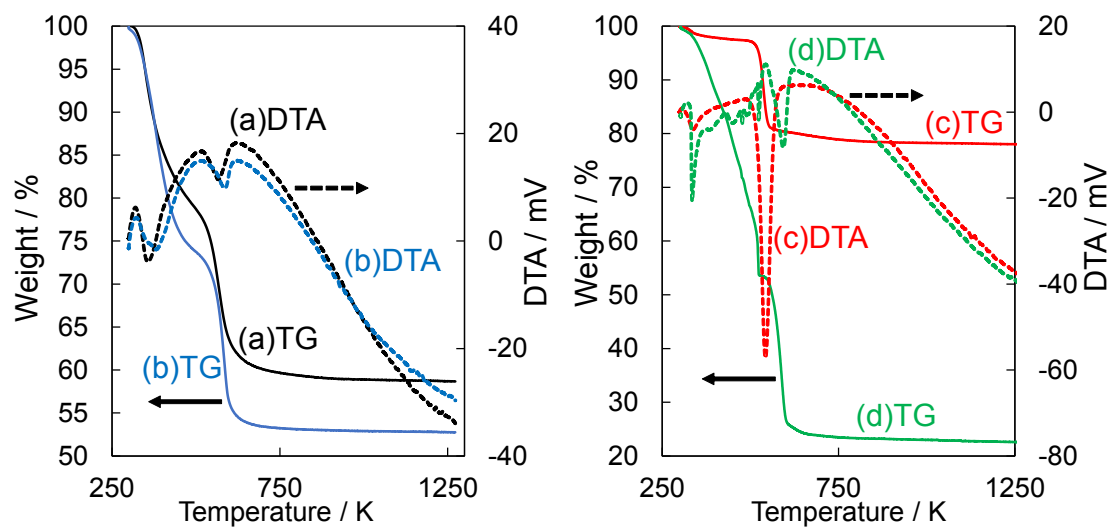

Fig. S7 Thermogravimetric–differential thermal analysis (TG–DTA) of various nickel compound powders. (a, black) powders prepared from  $\text{Ni}(\text{NO}_3)_2$  precipitated by a  $\text{KHCO}_3$  aqueous solution as in the preparation conditions of Ni/KB. (b, blue) purchased  $\text{NiCO}_3 \cdot 2\text{Ni}(\text{OH})_2 \cdot 4\text{H}_2\text{O}$  powders as a reference sample. (c, red) purchased  $\text{Ni}(\text{OH})_2$  powders as a reference sample. (d, green) purchased  $\text{Ni}(\text{NO}_3)_2 \cdot 6\text{H}_2\text{O}$  powders as a reference sample.

TG-DTA (Rigaku, TG8120) was carried under air. The temperature range is from ambient to 1273 K with a heating rate from  $5 \text{ K min}^{-1}$ .

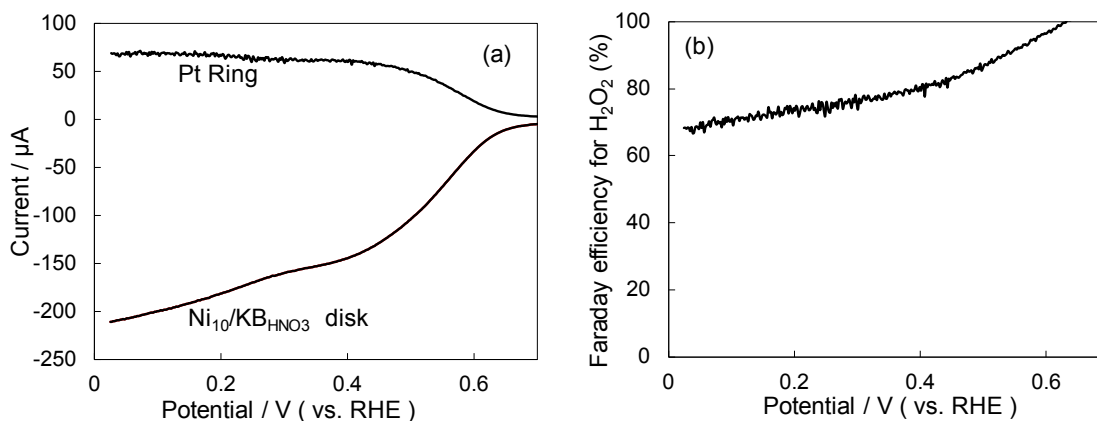

Fig. S8 Linear sweep voltammetry of a rotating ring disk electrode (RRDE) with (a) the ring current collected on a Pt ring at a constant potential of +0.1 V (vs. RHE) and the Ni<sub>10</sub>/KB<sub>HNO3</sub> loaded on the disk geometric current. (b) Faradaic efficiency for H<sub>2</sub>O<sub>2</sub>. Measurements were performed in O<sub>2</sub>-saturated 2.0 M KHCO<sub>3</sub> at a scan rate of 2 mV s<sup>-1</sup> at 1,000 rpm at room temperature.

Electrochemical experiments were conducted using an electrochemical analyzer (Hokuto Denko, HZ7000) equipped with a rotating ring disk electrode system (BAS Instruments, RRDE-3A). A standard three-electrode cell containing a counterelectrode (Pt wire), a reference electrode (Ag/AgCl), and a rotating ring disk electrode (working electrode, from BAS Instruments) was used. The working electrodes were constructed using the configuration proposed by Paulus et al.<sup>(A)</sup> and Assumpc,ão et al.<sup>(B-D)</sup> and supported on a central glassy carbon (area = 0.1256 cm<sup>2</sup>) and a Pt ring (area = 0.1886 cm<sup>2</sup>). KHCO<sub>3</sub> aqueous solution (2.0 M) was used as the electrolyte. The electrode rotation rate was varied from 1,000 rpm. During the ORR measurements, the electrolyte was first saturated with oxygen for 30 min, and the flow was maintained over the electrolyte during the experiment. The measurements were performed at a fixed scan rate of 2 mV s<sup>-1</sup> at room temperature. Faradaic efficiency for H<sub>2</sub>O<sub>2</sub> production (FE(H<sub>2</sub>O<sub>2</sub>)) was calculated according to Eq. 1:

$$\text{FE}(\text{H}_2\text{O}_2)(\%) = 200 \times I_{\text{ring}} / (N \times -I_{\text{disk}} + I_{\text{ring}}) \quad (1)$$

where  $I_{\text{ring}}$  is the ring current and  $I_{\text{disk}}$  is the disk current.<sup>(E)</sup>

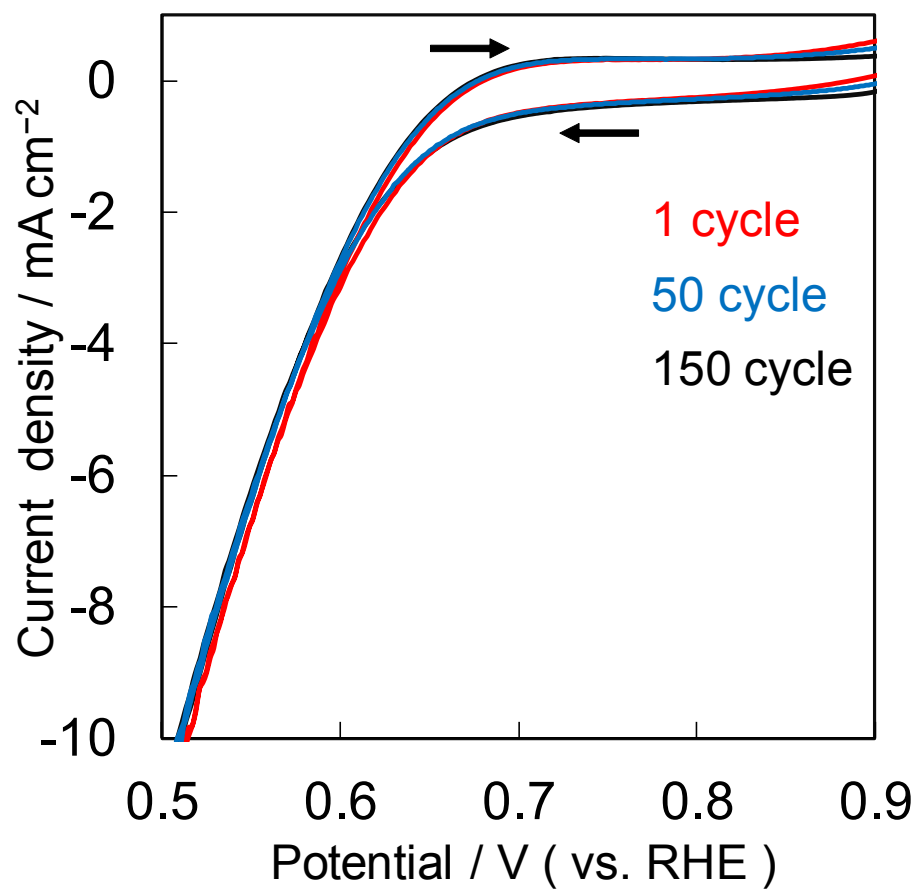

Fig. S9 Multiple-cycle tests on  $I-E$  curves of Ni<sub>10</sub>/KB<sub>HNO3</sub> before and after potential sweeps (+0.9 to +0.5 V vs. RHE) at a scan rate of 2 mV s<sup>-1</sup>.

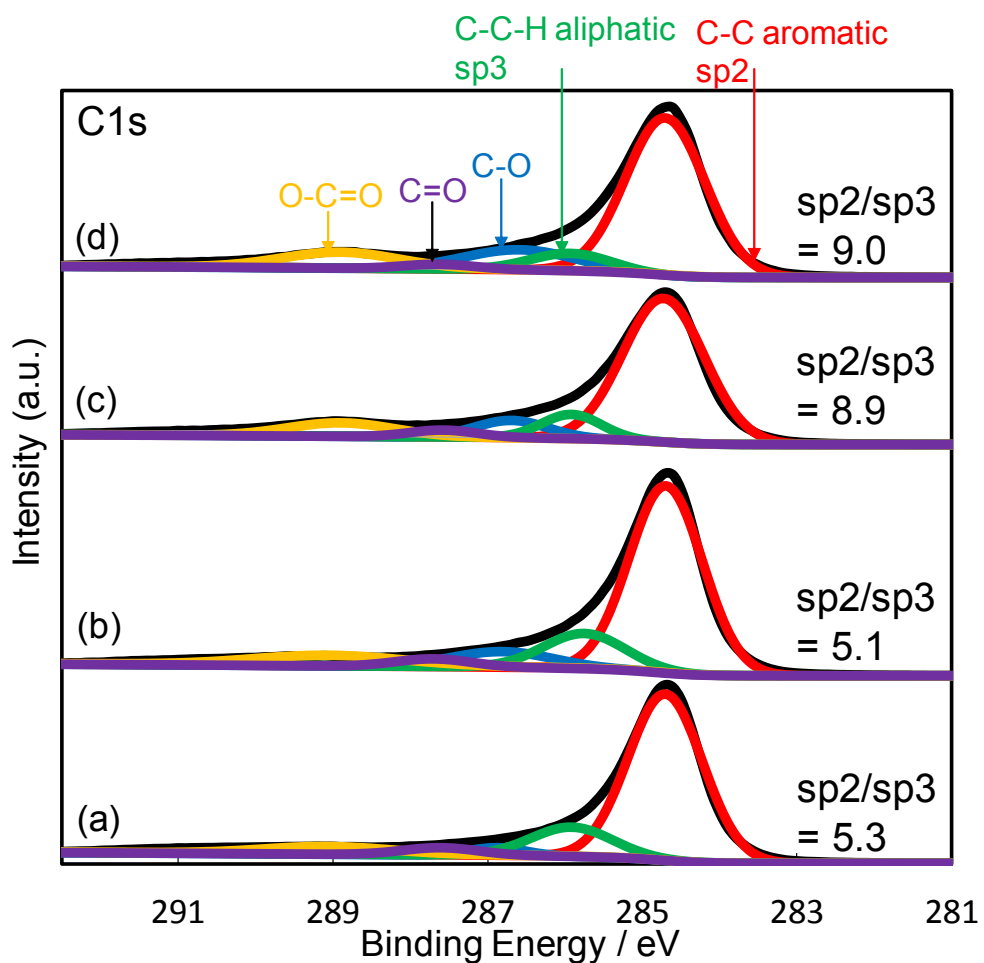

Fig. S10 C1s XPS spectra of (a) pristine KB powder, (b) Ni<sub>10</sub>/KB cathode, (c) KB<sub>HNO<sub>3</sub></sub> cathode, and (d) Ni<sub>10</sub>/KB<sub>HNO<sub>3</sub></sub> cathode

X-ray photoelectron spectroscopy (XPS, Ulvac-Phi, XPS1800) was carried out using an Al-K $\alpha$  source ( $h\nu = 1,486.6$  eV) with a neutralizing gun, and the vacuum in the analysis chamber was maintained at  $10^{-8}$  atm. C1s and Ni2p spectra were acquired with a  $0.1$  eV  $\text{step}^{-1}$  an energy interval.

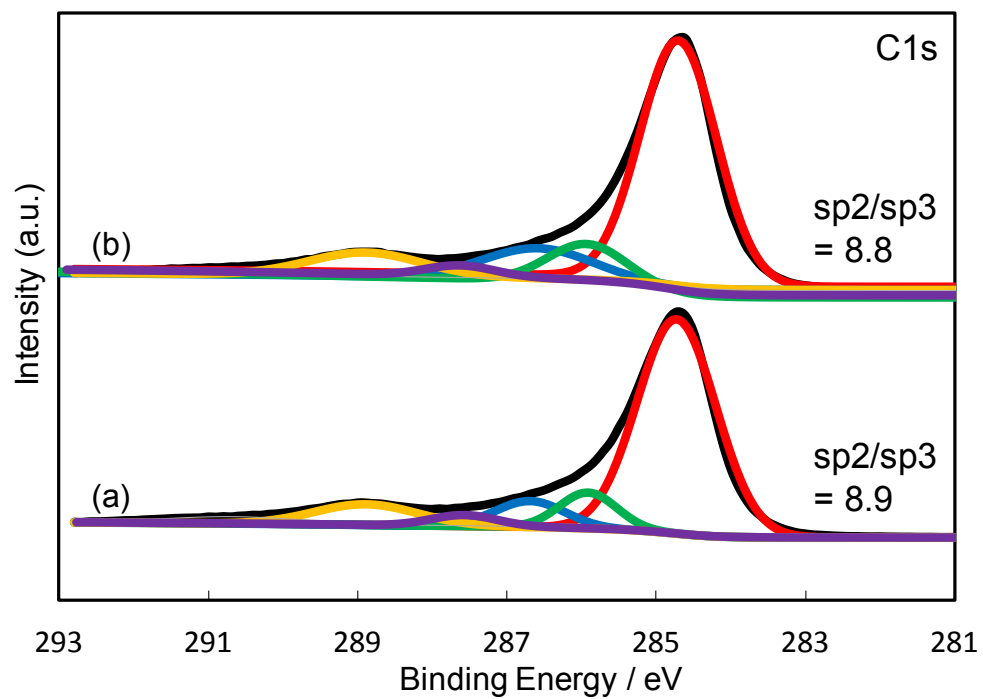

Fig. S11 C1s XPS spectra of (a)  $\text{KB}_{\text{HNO}_3}$  and (b) after washing with distilled water.

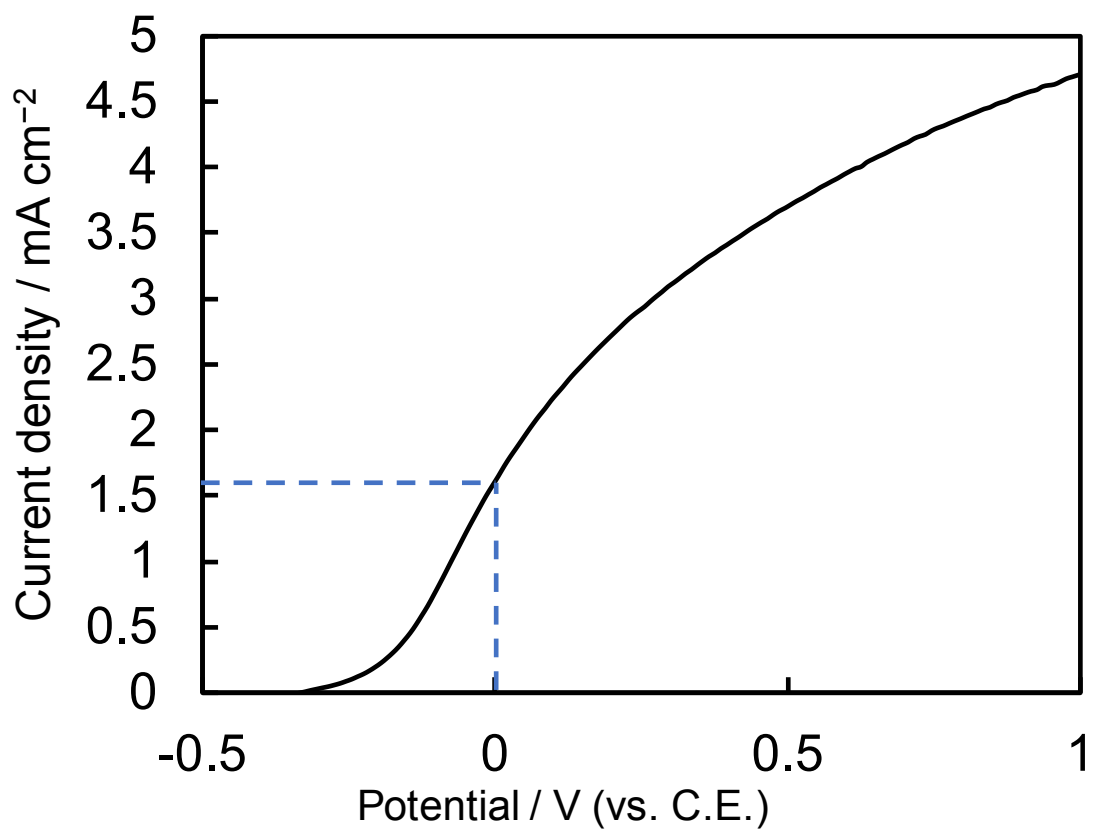

Fig. S12  $I$ - $E$  curve using  $\text{BiVO}_4/\text{WO}_3$  anode and  $\text{Ni}_{10}/\text{KB}_{\text{HNO}_3}$  cathode. Measurement conditions are as follows: a two-electrode system in a one-compartment cell was used with 2.0 M  $\text{KHCO}_3$  aqueous solution under  $\text{CO}_2$  and  $\text{O}_2$  bubbling each for  $50 \text{ mL min}^{-1}$  at a scan rate of  $10 \text{ mV s}^{-1}$  under illumination (AM1.5G, 1SUN).

## References

- (A) U.A. Paulus, T.J. Schmidt, H.A. Gasteiger, R.J. Behm, *J. Electroanal. Chem.* **495**(2001) 134–145.
- (B) M.H.M.T Assumpção, A. Moraes, R.F.B De Souza, I. Gaubeur, R.T.S. Oliveira, V.S. Antonin, G.R.P. Malpass, R.S. Rocha, M.L. Calegari, M.R.V. Lanza, M.C. Santos, *Appl. Catal. A: Gen.* **411-412** (2012), 1-6.
- (C) M.H.M.T. Assumpção, R.F.B. De Souza, D.C. Rascio, J.C.M. Silva, M.L. Calegari, I. Gaubeur, T.R.L.C. Paixão, P. Hammer, M.R.V. Lanza, M.C. Santos, *Carbon* **49** (2011) 2842–2851.
- (D) M.H.M.T. Assumpção, D.C. Rascio, J.P.B. Ladeia, R.F.B. De Souza, E.T. Neto, M.L. Calegari, R.T.S. Oliveira, I. Gaubeur, M.R.V. Lanza, M.C. Santos, *Int. J. Electrochem. Sci.* **6** (2011) 1586–1596.
- (E) C. H. Choi, H. C. Kwon, S. Yook, H. Shin, H. Kim, and M. Choi, *J. Phys. Chem. C* 2014, **118**, 30063–30070.
- (F) Y. Liu, X. Quan, X. Fan, H. Wang and S. Chen, *Angew. Chem. Int. Ed.*, 2015, **54**, 6837-6841.
- (G) L. Zhou, M. Zhou, Z. Hu, Z. Bi and K. G. Serrano, *Electrochim. Acta*, 2014, **140**, 376-383.
- (H) R. Babaei-Sati and J. B. Parsa, *J. Ind. Eng. Chem.*, 2017, **52**, 270-276.
- (I) Y. Miyase, S. Takasugi, S. Iguchi, Y. Miseki, T. Funaki, T. Gunji, K. Sasaki, E. Fujita and K. Sayama, *Sustain. Energy Fuels*, 2018, **2**, 1621-1629.
- (J) J. Choi, S.H. Hwang, J. Jang and J. Yoon, *Electrochem. Commun.*, 2013, **30**, 95-98.
- (K) A. Bonakdarpour, D. Esau, H. Cheng, A. Wang, E. Gyenge and D. P. Wilkinson, *Electrochim. Acta*, 2011, **56**, 907-9081.
- (L) K. Zhao, Y. Su, X. Quan, Y. Liu, S. Chen and H. Yu, *J. Catal.*, 2018, **357**, 118-126.
- (M) X. Shi, Y. Zhang, S. Siahrostami and X. L. Zheng, *Adv. Energy Mater.*, 2018, **8**, 1801158.
- (N) K. Fuku, Y. Miyase, Y. Miseki, T. Funaki, T. Gunji and K. Sayama, *Chem. Asian J.*, 2017, **12**, 1111-1119.
- (O) T. H. Jeon, H. Kim, H. Kim and W. Choi, *Energy Environ. Sci.*, 2020, **13**, 1730-1742.
- (P) K. Mase, M. Yoneda, Y. Yamada and S. Fukuzumi, *Nat. Commun.*, 2016, **7**, 11470.
- (Q) K. Mase, M. Yoneda, Y. Yamada and S. Fukuzumi, *ACS Energy Lett.*, 2016, **1**, 913-919.
